# Supplementary material for: Characteristics of Ground Ozone Concentration over Beijing from 2004 to2015: Trends, Transport, and Effects of Reductions
Source: Copernicus journal article supplement (doi:10.5194/acp-2016-508), 2016-08-10
Supplement: Supplementary file [file acp-2016-508-AC1-supplement.pdf]

# Characteristics of Ground Ozone Concentration over Beijing from 2004 to 2015: Trends, Transport, and Effects of Reductions

Nianliang Cheng<sup>1,2,3</sup>, Yunting Li<sup>1</sup>, Dawei Zhang<sup>1,4\*</sup>, Tian Chen<sup>5</sup>, Feng Sun<sup>1,6</sup>, Chen Chen<sup>1,6</sup>, Fan Meng<sup>2,3</sup>

<sup>1</sup>Beijing Key Laboratory of Airborne Particulate Matter Monitoring Technology, Beijing Municipal Environmental Monitoring Center, Beijing 100048, China

<sup>2</sup>College of Water Sciences, Beijing Normal University, Beijing 100875, China

<sup>3</sup>State Key Laboratory of Environmental Criteria and Risk Assessment, Chinese Research Academy of Environmental Sciences, Beijing 100012, China

<sup>4</sup>Department of Environmental Science and Engineering, Tsinghua University, Beijing 100084, China

<sup>5</sup>Beijing Municipal Environmental Protection Bureau, Beijing 100044, China

<sup>6</sup>Department of Environmental Science, Peking University, Beijing 100871, China

\*Corresponding author at: Beijing Municipal Environmental Monitoring Center, Beijing 100048, China. E-mail address: zhangdawei@bjmemc.com.cn (W.D. Zhang).

**Abstract:** Based on the hourly averaged ozone monitoring data during 2004–2015 in urban area and at DL background station in Beijing, a comprehensive discussion of the characteristics of ozone concentration was conducted. Annual averaged concentration of daily maximum 1 h ozone ( $O_3$  1h) was all increasing at urban sites ( $1.79 \text{ ppbv yr}^{-1}$ ) and DL background station ( $2.05 \text{ ppbv yr}^{-1}$ ) while daily maximum 8 h average ozone concentration ( $O_3$  8h) was increasing in urban area ( $1.14 \text{ ppbv yr}^{-1}$ ) and slightly decreasing at DL background station ( $-0.47 \text{ ppbv yr}^{-1}$ ) from 2004 to 2015 due to different ozone sensitivity regimes and ratios of  $NO_2/NO$ . Diurnal variations of ozone peaks obtained at downwind DL station were about 1 hour later than that in urban area from May to October in different years and concentrations of ozone at a DL background station were much higher than those at urban sites. Moreover, the differences of ozone peaks between urban sites and DL background station were becoming significantly smaller in recent years, which may be related to the regional ozone transport and the expansion urbanization of Beijing. Based on the joint efforts of regional air pollution prevention and control, Beijing achieved the 2015 Grand Military Parade blue. Calculated average concentrations of CO,  $NO_2$ , and  $O_3$  in S2 (August 20~31, 2015) and S3 (September 01~03, 2015) decreased by 31.48%, 43.97%, and 13.21% at urban sites, and by 20.93%, 57.10%, and 23.62% at DL station, respectively compared with those in S1 (August 01~19, 2015) and S4 (September 04~30, 2015). A reduction of local anthropogenic emissions such as VOCs and  $NO_x$  could decrease ozone efficiently especially in downwind areas of Beijing and made the ozone peaks appear 2~3 hours earlier compared to the scenarios of no emission reductions. Compared to the increasing ozone during APEC period, average ozone concentration decreased significantly in the downwind Beijing due to larger ratios of VOCs/ $NO_x$ . In order to decrease the ozone concentrations in Beijing, VOCs

38 emissions should be reduced larger and be controlled stricter than those of NO<sub>x</sub> in Beijing and  
39 the policy of regional air pollution joint prevention and control should still be promoted  
40 unswervingly and jointly.

41

42 **Key words:** O<sub>3</sub>8h; trend; Beijing; regional transport; reductions

43

## 44 **1. Introduction**

45 Ground-level ozone, one of the most important secondary air pollutants in the atmosphere,  
46 is generated through photochemical reactions between nitrogen oxides ( $\text{NO}_x$ ) and volatile  
47 organic compounds (VOCs) (Trainer et al., 2000; Sillman, 1999). High concentrations of  
48 ozone near the ground are harmful to human health, ecosystems, and global climate (Fiore et  
49 al., 2009).

50 In recent years, elevated regional ozone concentration and atmospheric oxidation capacity  
51 in China have attracted increasing attentions (Lin et al., 2008; Zhang et al., 2007). Numerous  
52 studies have analyzed the variations of ozone and its photochemical reactions with its  
53 precursors based on the measurements over a short period or satellite data (Chan et al., 2003;  
54 Wang et al., 2012; Vingarzan, 2004). Most studies in China were mainly concentrated in city  
55 cluster regions, such as Pearl River delta (Li et al., 2011; Wei et al., 2012; Zhang et al., 2013),  
56 Yangtze River delta (Li et al., 2014; Ding et al., 2013; Ran et al., 2009), and Beijing–Tianjin–  
57 Hebei regions(BTH) (Tang et al., 2009; Shao et al., 2009; Lu et al., 2010). These studies  
58 focused on the chemical characteristics of ozone, with few discussions on the variation  
59 trends, ozone transport and its influencing factors especially by regional reduction measures  
60 within a long period for the lack of observed data in Beijing (An et al., 2006; Chou et al.,  
61 2009; Yuan et al., 2009) and other limiting factors.

62 Different to the continuously decreasing ground ozone concentrations in urban sites in the  
63 US (Pollack et al., 2013), recent limited studies performed in China, particularly in BTH area,  
64 suggested that ozone concentrations in both regional background and urban areas are  
65 increasing (Meng et al., 2009; Wang et al., 2008) due to large  $\text{NO}_x$  emissions. Few long-term  
66 studies about the trends of ground-level ozone in Beijing were discussed (Lu et al., 2010), let  
67 alone analyze the trends of daily maximum 8 h averaged ozone concentration ( $\text{O}_3$  8h) and  
68 daily maximum 1 h ozone concentration ( $\text{O}_3$  1h) and the effects of urbanization and regional  
69 emission reduction measures on ozone concentrations. After the implementation of the new  
70 standard of "Ambient Air Quality Standard" (MEP, 2013) in 2013, the levels of  $\text{O}_3$  1h and  $\text{O}_3$   
71 8h have a direct impact to the ranks of the air quality in Beijing. Furthermore, the increasing  
72 ozone pollution in Beijing have obtained much public concerns from Beijing Municipal  
73 Government and the whole society (Ding et al., 2013; Wang et al., 2013) especially in  
74 Summer. The executive meeting of the State Council examined and adopted "The Control  
75 Measures of Beijing Air Pollution during 2012–2020"  
76 (<http://zhengwu.beijing.gov.cn/gzdt/gggs/t1225355.htm>). According to the regulation, the  
77 non-attainment hours of ozone in Beijing will decrease by 30% than that in 2010 and should

78 be controlled at about 200 hours annually. Therefore, the results of previous studies were far  
79 from the current needs.

80 Air quality security programs were implemented from August 20 to September 3 in 2015  
81 to guarantee the air quality for the parade on the 70th Victory Memorial Day for the Chinese  
82 People's War of Resistance against Japanese Aggression (the 2015 Grand Military Parade).  
83 Chinese government established numerous emission reduction measures, such as reducing  
84 coals, industrial adjustment, joint prevention measures, and limitation of vehicles (particularly  
85 heavy-duty buses and trucks from outside Beijing, and odd-even license plate policy on roads  
86 within urban Beijing). As regional emission reduction measures can not be copied and costs a  
87 lot of manpower and material resources, it offers a precious opportunity to study the changes  
88 in ozone and its precursors during the period of air quality assurance.

89 This paper aims to investigate the temporal trends of O<sub>3</sub>1h and O<sub>3</sub>8h in different sites in  
90 Beijing and verify the importance of ozone transport. Also, we evaluated the changes on  
91 ozone concentration after the reduction measures during the 2015 Grand Military Parade in  
92 2015.

93

## 94 **2 Materials and methods**

### 95 **2.1 Site distribution**

96 Beijing is located at 115.7 °E–117.4 °E, 39.4 °N–41.6 °N. This area is at the northwest edge of  
97 the North China Plain and close to the edge of the semi-desert zone. Its terrain exhibits a  
98 dustpan shape, and it is surrounded by mountains in three directions. The average altitude of  
99 Beijing is 43.5 m, and the general altitude of mountains is in the range of 1 000–1 500 m,  
100 which is not conducive to air pollutants diffusion. The total area of Beijing is 16410.54 km<sup>2</sup>,  
101 in which 62% are mountains. Its total forest coverage in the plain region is about 15%, which  
102 is lower than that in whole city (38%). Beijing exhibits a temperate continental monsoon  
103 climate, where it is hot and rainy in summer and cold and dry in winter. Over the past decade,  
104 the annual averaged rainfall is less than 450 mm, 80% of which is concentrated in June, July,  
105 and August (BJEPB,2014; Beijing Statistics Bureau, 2014).

106 As the capital of China, the air quality monitoring network in Beijing is more advanced  
107 than other regions of China (BJEPB, 2014). In 2001, an air quality monitoring network that  
108 obtains 35 stations was established by the Beijing Municipal Environmental Monitoring  
109 Center (BJMEMC, <http://zx.bjmemc.com.cn/>, **Fig. 1**). The 35 stations cover all districts that  
110 contain different environment types defined by regional background, such as suburbs, city,  
111 and residential. Twelve monitoring sites (DL, DS, GY, TT, WSXG, AT, NZG, WL, GC, SY,

112 CP, HR) in urban area and one background station DL were selected in Beijing and used in  
113 this study. DL station (116.22 °E, 40.29 °N, about 45 km northwest of Tiananmen square) is  
114 the background station of World Meteorological Organization Environmental Monitoring  
115 center in China and has conducted air pollutant monitoring work for decades. Meteorological  
116 sounding data in Beijing at Guanxiangtai station (GXT,54511, 116.46 °E, 39.80 °N) were  
117 downloaded from the Department of Atmospheric Science, College of Engineering,  
118 University of Wyoming (<http://weather.uwyo.edu/upperair/sounding.html>).

119 In this study, we retrieved NO<sub>2</sub> and HCHO VCDs from the OMI products in urban Beijing  
120 (GY site, 116.33 °E, 39.93 °N) and combined the corresponding ratios to analyze the  
121 chemical sensitivity of PO<sub>3</sub> (ozone production rate) during both Parade and APEC periods.

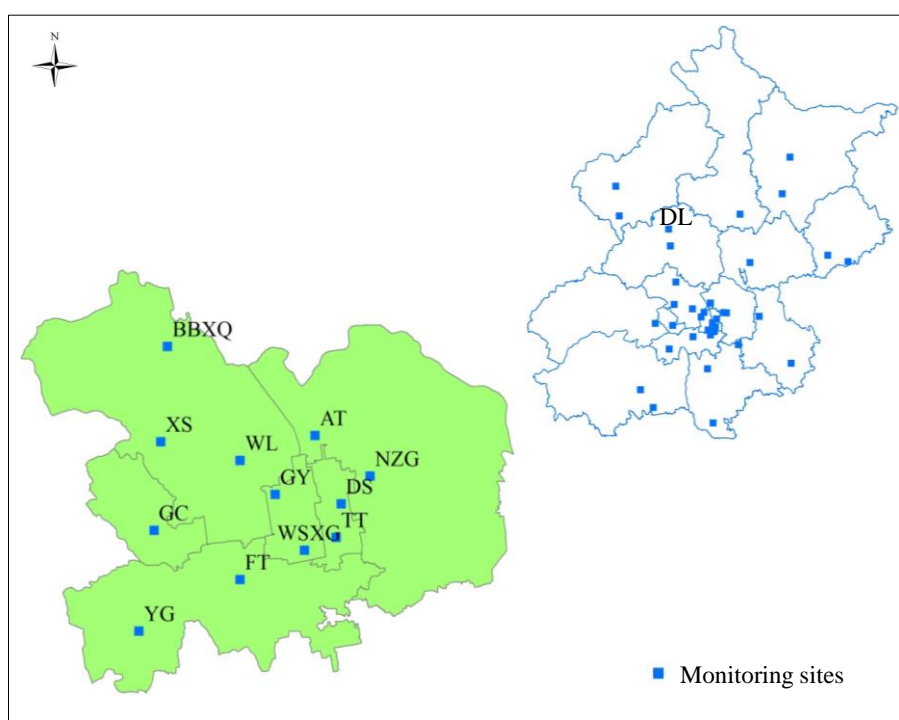

122  
123 **Fig. 1** Distribution and classification of observation sites in Beijing  
124

## 125 2.2 Monitoring instruments

126 Ozone are monitored by the 49C ozone analyzer instruments produced by Thermo  
127 Fisher Corporation (USA). The minimum limit of ozone analyzer instrument is  $1 \times 10^{-9}$ , and  
128 the zero and cross drifts are 0.4%/24 h and  $\pm 1\%$  /24 h, respectively. An ozone calibrator  
129 (49IPS) traceable to the Standard Reference Photometer maintained by the WMO World  
130 Calibration Center was used to calibrate the ozone analyzers. Ozone monitoring instrument at  
131 each station had a zero cross calibration every three days, precision audit every three month,  
132 and an accuracy check every six months to ensure the accuracy of ozone monitoring in  
133 Beijing. Thermo Fisher 42C NO-NO<sub>2</sub>-NO<sub>x</sub> analyzer was used to monitor NO and NO<sub>2</sub>

134 concentrations with a limit of  $0.05 \times 10^{-9}$ , zero drift of  $0.025 \times 10^{-9}/24$  h, and span drift of  
 135  $\pm 1\%/24$ h. Operation procedure strictly followed the “The Specification of Environmental Air  
 136 Quality Automatic Monitoring Technology” (HJ/T193-2005,  
 137 [http://kjs.mep.gov.cn/hjbhzbz/bzwb/dqjhjh/jcgfffbz/200601/t20060101\\_71675.htm](http://kjs.mep.gov.cn/hjbhzbz/bzwb/dqjhjh/jcgfffbz/200601/t20060101_71675.htm)), and the  
 138 equipments were regularly calibrated and maintained by technicians.

139  
 140

### 141 3 Results and Discussion

#### 142 3.1 Variations trends

143 In Beijing, the nonattainment days of ozone is mainly concentrated in the months of  
 144 May to September and the comparisons of trend analysis between nonattainment days and  
 145 reaching standard days were very meaningful in some mega cities especially Beijing  
 146 (<http://www.bjepb.gov.cn/bjepb/323474/324034/324735/index.html>). A simple linear  
 147 regression and statistical tests, such as Pearson's correlation analysis were implemented to  
 148 investigate the trends of  $O_3$ 1h and  $O_3$ 8h in urban area and at DL station in Beijing (**Fig. 2**), for  
 149 the inter-annual variations of ozone concentrations in urban Beijing,  $O_3$ 1h was in an evident  
 150 upward trend with an annual averaged concentration growth rate (AAGR) of  $1.79 \text{ ppbv yr}^{-1}$   
 151 (correlation coefficient  $R=0.82$ , highly correlated) and an higher increase of  $2.84 \text{ ppbv yr}^{-1}$   
 152 during May to September (MSAGR,  $R=0.87$ , highly correlated) from 2004 to 2015. Variation  
 153 of  $O_3$ 8h was in an overall upward trend with AAGR of  $1.14 \text{ ppbv yr}^{-1}$  ( $R=0.88$ , highly  
 154 correlated) and MSAGR of  $1.68 \text{ ppbv yr}^{-1}$  ( $R=0.85$ , highly correlated) during May to  
 155 September, respectively from 2004 to 2015. For the variations of ozone concentration at DL  
 156 background station,  $O_3$ 1h was in an overall upward trend with AAGR of  $2.05 \text{ ppbv yr}^{-1}$   
 157 ( $R=0.81$ , highly correlated) and MSAGR of  $0.14 \text{ ppbv yr}^{-1}$  ( $R=0.10$ , micro relevant), whereas  
 158  $O_3$ 8h was in a slightly downward trend (AAGR= $-0.47 \text{ ppbv yr}^{-1}$ ,  $R=-0.42$ , weak  
 159 correlation, real relevant; MSAGR= $-0.70 \text{ ppbv yr}^{-1}$ ,  $R=-0.40$ , real relevant).

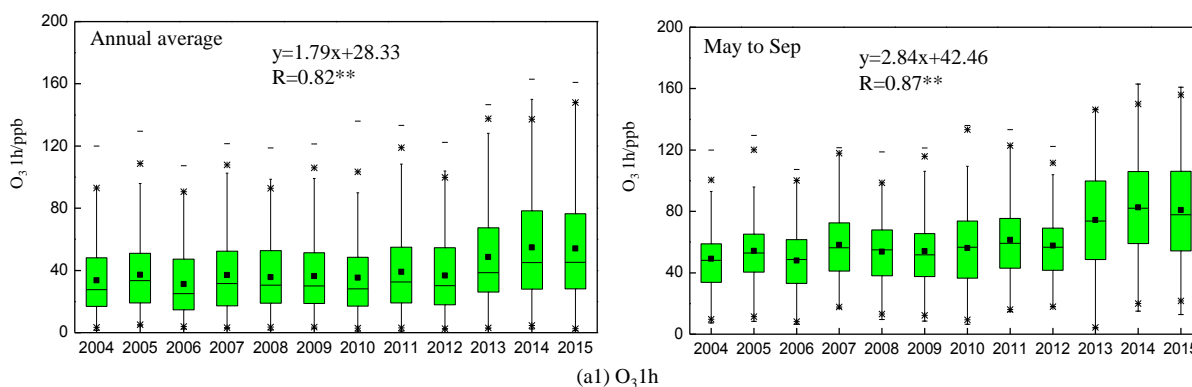

160

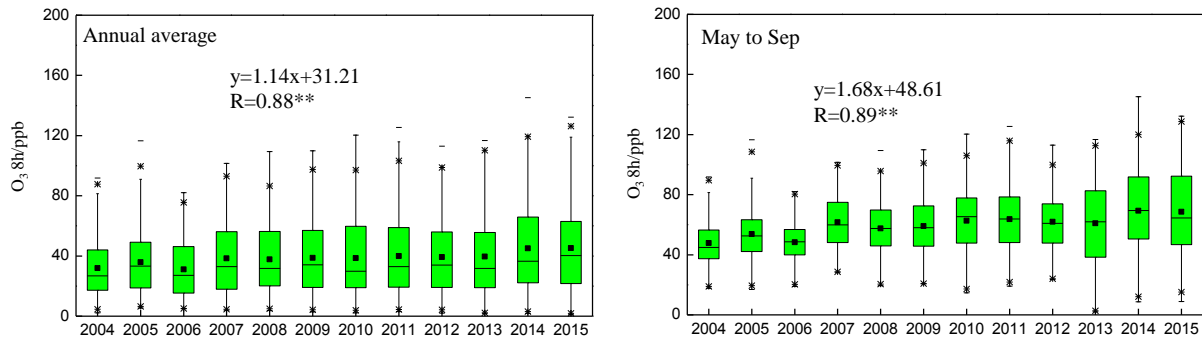

(a2) O<sub>3</sub>8h  
(a) Urban

161

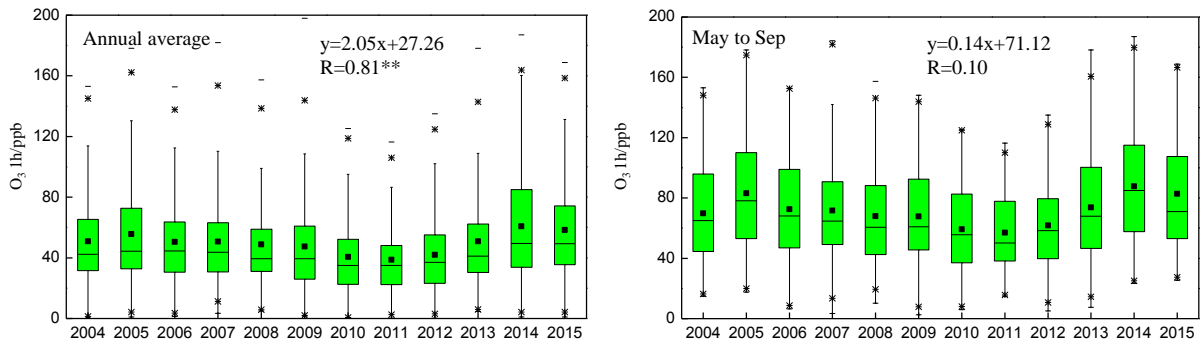

(b1) O<sub>3</sub>1h

162

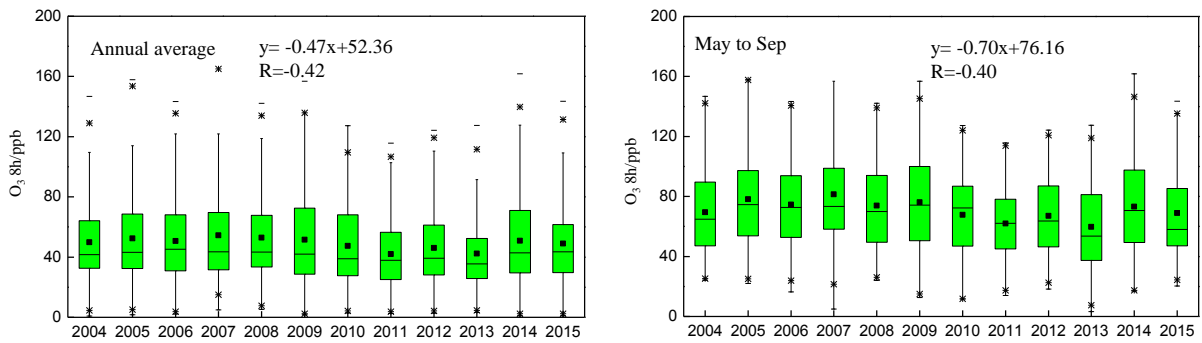

(b2) O<sub>3</sub>8h  
(b) DL

163

164

165

166

**Fig. 2** Variation trends of O<sub>3</sub>1h and O<sub>3</sub>8h in urban Beijing (a1, a2) and at DL background station (b1, b2) from 2004 to 2015 (including annual trends and trends from May to September) and the linear fitting equations(95% confidence interval, two-tailed, \*\*highly relevant)

167

$$r = \frac{\sum (X - \bar{X})(Y - \bar{Y})}{\sqrt{\sum (X - \bar{X})^2 \sum (Y - \bar{Y})^2}} \quad (R1)$$

168

169

170

171

172

173

174

175

176

(r is the pearson correlation coefficient; X is the ozone concentration; Y presents the year; r between 0 and 0.3 representing the micro relevant, r between 0.3 and 0.5 representing the real relevant, r between 0.5 and 0.8 representing the significant relevant, and r between 0.8 and 1.0 representing highly relevant)

The Mann–Kendall trend detection test(Kendall, 1975) has been commonly applied to assess the significance of monotonic trends in ozone pollution data time series and we found the year 2013 was an intercept break point. In 2008, Beijing held the Olympic Games and the ozone in Beijing decreased significantly. The good air quality promote the awareness of environmental protection to take various common emission reduction measures in the next few years. In

177 2013,the state implemented a new environmental air quality standards, marking the work of  
 178 environmental protection into a new stage. We divided the available the year of 2004-2015 of  
 179 zone data into three parts: 2004-2007, 2008-2012, and 2013-2015. For the variations of O<sub>3</sub>1h  
 180 and O<sub>3</sub>8h concentration in different periods at twelve sites in urban Beijing and DL  
 181 background site (**Fig.3**), concentrations of O<sub>3</sub>1h and O<sub>3</sub>8h were all significantly increased  
 182 during the period of 2013–2015 compared to those during the periods of 2004–2007 and  
 183 2008–2012. Average concentration of O<sub>3</sub>1h during the period of 2013–2015 increased  
 184 3.71%~40.29% at urban sites in Beijing compared to that during the period of 2004~2012  
 185 while average concentration of O<sub>3</sub>8h during the period of 2013–2015 increased  
 186 9.51%~62.58% at urban sites in Beijing compared to that during the period of 2004~2012.  
 187 Average concentration of O<sub>3</sub>1h during the period of 2013–2015 exceeded the standard about  
 188 77.53%~104.55% at urban sites in Beijing while it was 33.09%~92.32% for O<sub>3</sub>8h.  
 189 Therefore,the rising ozone concentration after the implementation of the new standards  
 190 highlighted the terrible ozone pollution situation in recent years in Beijing.  
 191

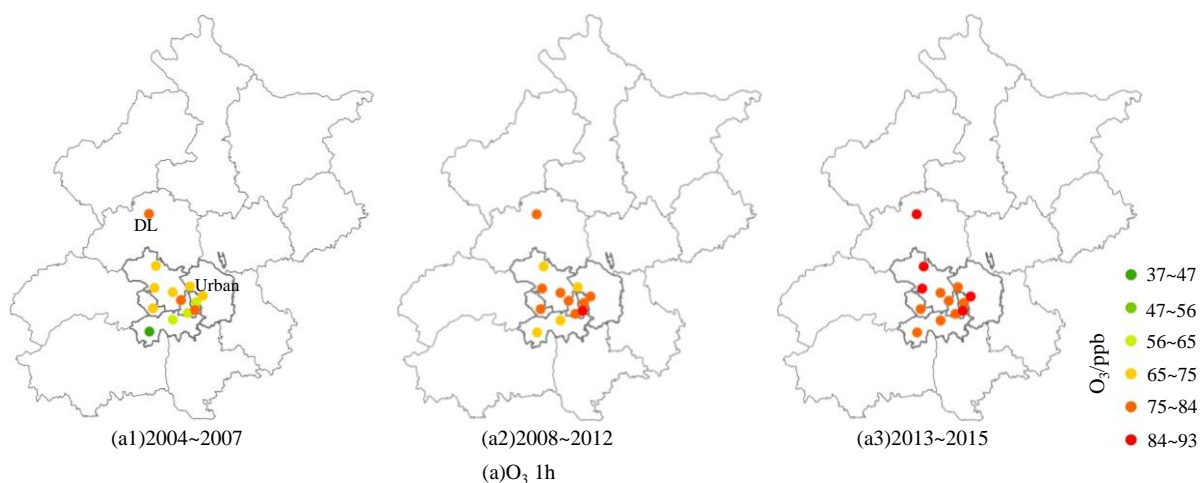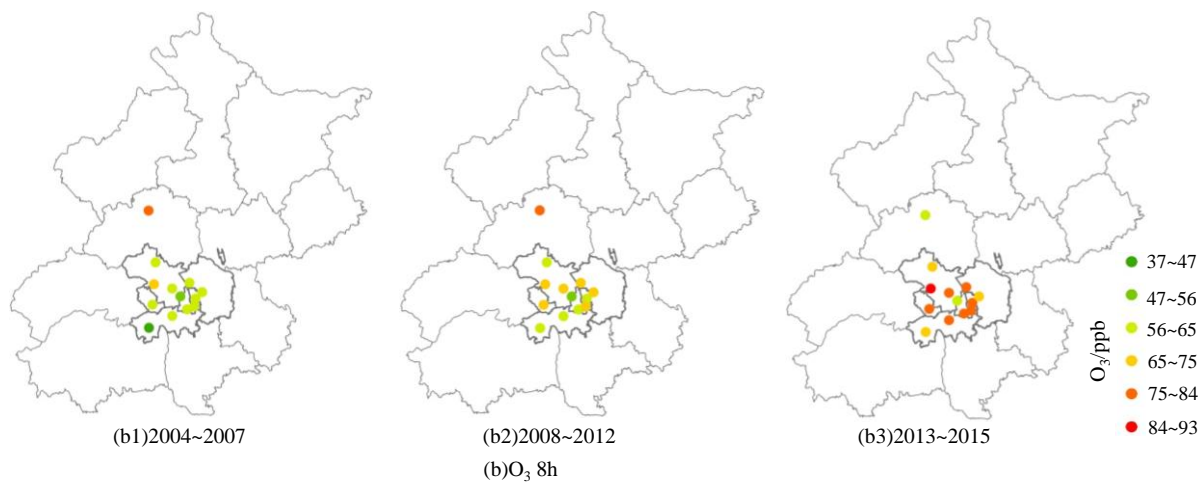

192

193



194 **Fig. 3** Average concentrations of O<sub>3</sub>1h and O<sub>3</sub>8h at urban sites and DL background site from May to September during the  
195 periods of 2004–2007, 2008–2012, and 2013–2015 in Beijing  
196

197 From the frequency distributions (proportion rates in different ozone concentration  
198 intervals) of O<sub>3</sub>1 h and O<sub>3</sub> 8h in Beijing (**Fig. 4**), frequency of O<sub>3</sub> 8h less than 10 ppbv  
199 increased significantly during the period of 2013 to 2015 compared with that during period of  
200 2008–2012 and frequency of ozone concentration higher than 80 ppbv also became larger  
201 both at DL background station and urban sites. For O<sub>3</sub> 1h, frequency of O<sub>3</sub> 1h higher than 80  
202 ppbv became significantly larger at both DL background station and urban sites during the  
203 period of 2013 to 2015 compared with that during period of 2008–2012 which indicated  
204 increasing frequencies of high ozone concentration caused the significant increase of O<sub>3</sub>1h in  
205 Beijing in recent years; whereas the low values of O<sub>3</sub>1h did not increased as O<sub>3</sub>8h. This  
206 phenomenon was basically consistent with a few recent studies (Tang et al., 2009; Jonson et  
207 al., 2006; Xu et al., 2008) and could explain the increasing high ozone concentrations in  
208 Beijing due to the increasing frequency of higher ozone concentration at both background  
209 station and urban sites. Parrish et al. (2014) found that ozone volume fraction increases at an  
210 annual growth of 0.2–0.3 ppbv yr<sup>-1</sup> in the Northern Hemisphere. Also, Meng et al. (2009)  
211 observed that ozone volume fraction increases at a rate of 1.0 ppbv yr<sup>-1</sup> at the background  
212 station in Shanghai, China. In addition, Tang et al. (2009) found that ozone volume fraction  
213 increases at a rate of 1.1 ± 0.5 ppbv yr<sup>-1</sup> during 2001–2006 in Beijing.

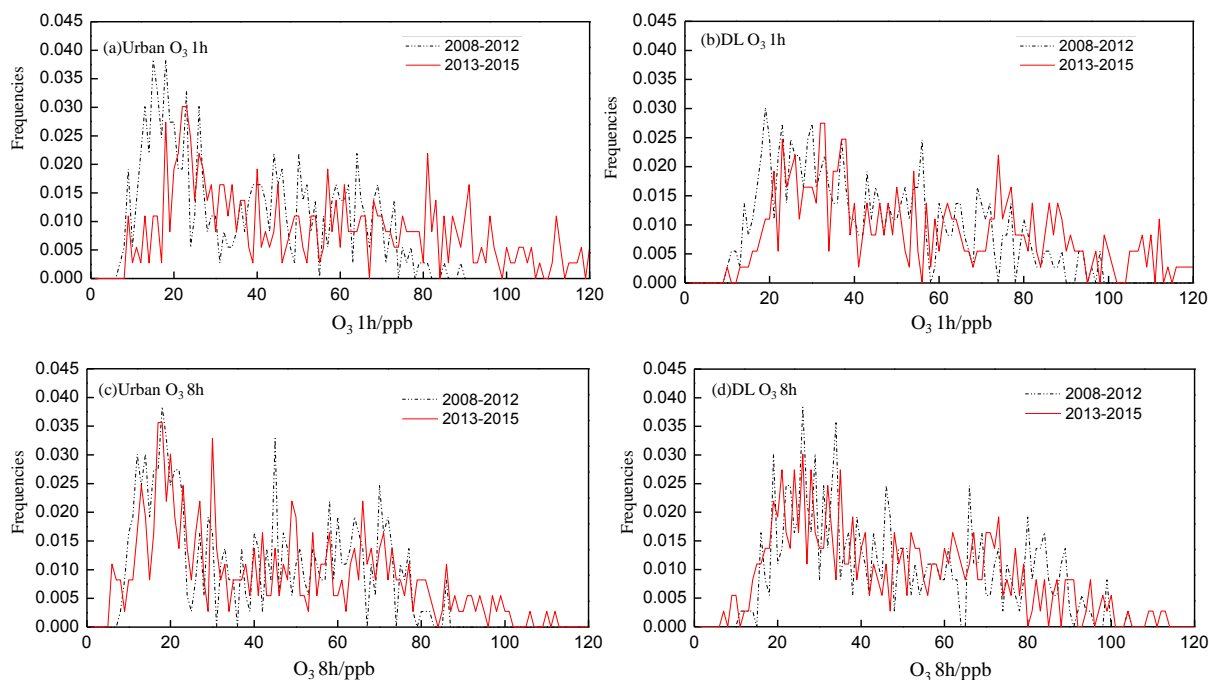

215 **Fig. 4** Frequency distribution of the ozone concentrations(O<sub>3</sub>1h and O<sub>3</sub>8h) at DL and urban Beijing for the periods of 2008–  
216 2012 and 2013–2015  
217  
218

219 During 2008–2015, ratios between NO<sub>2</sub> and NO (lack of nitrogen oxide observed data  
220 during 2004–2007, **Table 1**) increased significantly with AAGR of 0.46 (R=0.85, highly  
221 relevant,95% confidence interval, two-tailed) and 1.87 (R=0.93,highly relevant,95%  
222 confidence interval, two-tailed) at urban sites and DL background station respectively,  
223 indicating ratios between NO<sub>2</sub> and NO were increasing larger at background station than  
224 urban sites in Beijing. Hourly averaged concentrations of NO<sub>x</sub> were in the range of 29.21–  
225 39.76 ppbv,11.85–13.91 ppbv at urban sites and DL background station, respectively. NO<sub>x</sub>  
226 concentration was in a downward trend with AAGR of –0.43 ppbv yr<sup>-1</sup> (R=0.32, real  
227 relevant,95% confidence interval, two-tailed) and –0.21 ppbv yr<sup>-1</sup> (R=0.24, micro  
228 relevant,95% confidence interval, two-tailed) at urban and DL background sites, respectively.  
229 This study could not further analyze the formation mechanism of ozone due to lack of  
230 observed data for VOCs during 2008–2015, but research indicated the VOCs concentration  
231 also declines in recent year in Beijing (Lu et al., 2010; Wang et al., 2015a). Wang et al.(2015a)  
232 found mixing ratios of NMHCs measured at PKU university site decreased by 37% during  
233 August increased by 28% from 2004 to 2012 and the measured NMHC/NO<sub>x</sub> ratios declined  
234 by 14% during August from 2005 to 2012.Since,Non-methane hydrocarbons (NMHCs)  
235 accounts for the vast majority of VOCs and plays a critical role in the photochemical  
236 production of ozone, variations of VOCs should be further investigated for a thorough  
237 understanding of ozone trends in the future.

238 Ozone precursors (VOCs and NO<sub>x</sub>) were decreasing, whereas average concentrations of  
239 O<sub>3</sub>8h were still increasing in urban Beijing, which may be caused by the particular sensitivity  
240 regimes and other related factors. Although previous studies indicated the distribution of the  
241 sensitivity regimes of O<sub>3</sub>8h concentration was similar to that of O<sub>3</sub>1h concentration (Zhang et  
242 al., 2008), this distribution was a little different in urban Beijing (Shao et al., 2006). The  
243 important reason was that the distribution of ozone sensitivity regimes is closely related to  
244 meteorological condition and emission distribution (Zhang et al., 2008; Sillman, 1999).  
245 Generally,ozone reactions are mainly VOCs-sensitive and NO<sub>x</sub>-sensitive in urban Beijing and  
246 suburban areas or more remote areas of Beijing, respectively (Tang et al., 2009). In urban  
247 Beijing, a reduction of anthropogenic NO<sub>x</sub> could increase local ozone efficiently while a  
248 reduction of anthropogenic NO<sub>x</sub> in urban and suburban areas could reduce ozone efficiently in  
249 downwind suburban areas. Except for different regimes,the other factors caused by the  
250 increasing ozone concentration may be related to a significant increase in regional  
251 tropospheric NO<sub>x</sub> concentrations, particularly in BTH area (Richter et al., 2005; Van der A et  
252 al., 2006), or high concentrations of the regional zone and its precursors transport (Parrish et

253 al., 2014). Also, the rapid growth of population and industrialization have driven substantial  
 254 increases in ozone background concentrations in BTH area (Willem et al., 2015). **Restricted**  
 255 **by P(Ox=O<sub>3</sub>+NO<sub>2</sub>) calculation and observation, we fail to present comprehensive explanations**  
 256 **to compare the characteristics of O<sub>3</sub> production between local Beijing and DL site. But**  
 257 **according to the analysis (Zhang et al., 2014), VOCs and NO<sub>x</sub> both decreased between 2006**  
 258 **and 2011 and the decrease in VOCs reactivity ( $-5\%yr^{-1}$ ) was slightly larger than the decrease**  
 259 **in NO<sub>x</sub> ( $-4\%yr^{-1}$ ), leading to a slight decrease in P(Ox). The sunshine hours and visibility**  
 260 **are also the important factors influencing O<sub>3</sub> production. Hence, variations of P(Ox) need to**  
 261 **be further investigated for a better understanding of ozone trends.**

262 **Table 1** Statistics of NO<sub>2</sub>/NO in urban areas and at DL site during 2008–2015 in Beijing  
 263

| Parameter                |             | 2008        | 2009        | 2010        | 2011        | 2012        | 2013        | 2014        | 2015        |
|--------------------------|-------------|-------------|-------------|-------------|-------------|-------------|-------------|-------------|-------------|
| NO <sub>x</sub><br>/ppbv | Urban sites | 32.93±23.45 | 36.52±23.52 | 39.76±38.32 | 37.42±23.17 | 35.01±21.42 | 37.71±23.85 | 36.26±21.89 | 29.21±18.83 |
|                          | DL site     | 13.91±11.95 | 16.30±14.17 | 15.12±9.33  | 17.95±14.59 | 16.35±14.45 | 17.66±16.72 | 14.42±11.95 | 11.85±10.74 |
| NO <sub>2</sub> /NO      | Urban sites | 3.61±2.46   | 2.87±1.87   | 3.01±2.13   | 3.33±2.62   | 3.74±3.32   | 4.05±3.83   | 5.07±4.96   | 5.13±4.30   |
|                          | DL site     | 4.89±3.01   | 3.68±2.24   | 4.27±2.15   | 4.75±2.17   | 8.12±6.67   | 8.41±5.48   | 10.83±6.88  | 12.18±10.97 |

264  
 265  
 266

### 267 3.2 Diurnal variations and regional transport

268 **Fig. 5** was the diurnal variations of ozone in urban Beijing and at DL station from May to  
 269 September during 2004–2015 and **Table 2** presented the statistical ozone peaks at DL station  
 270 and urban sites from May to September during 2004–2015. In general, ozone concentration at  
 271 **DL station was** higher than that of urban sites, and ozone peaks at DL station from May to  
 272 September in different years was 1.01–1.56 times that of urban sites. For the spatial  
 273 distribution of ozone, it was lower in central urban area and relatively higher in the northern  
 274 and western area with good vegetation. Ozone has a lifespan of several days; consequently,  
 275 high ozone concentrations can be found in regions distant from precursor emission sources  
 276 (Seinfeld 2004; Kalabokas *et al.*, 2000), and several chemical ozone destruction reactions  
 277 existing in urban center, such as R2–R3, are absent in background areas (Saitanis 2003; Pablo  
 278 *et al.*, 2013). In Beijing, NO<sub>x</sub> concentration in the urban center of the city was typically higher  
 279 because of the large amount of vehicle population, which consumed and titrated a certain  
 280 amount of ozone. The ozone peaks at DL station from May to September in different years  
 281 was obviously 1 hour behind than that of urban sites, which was closely related to the regional  
 282 ozone transport (R4). Most of the ozone was generated during the transport of its precursors

283 from emission districts to surroundings or background sites. In summer, high temperature,  
 284 strong solar radiation, low humidity, and small southwest wind in Beijing strengthen  
 285 photochemical pollution; moreover, ozone and its precursors, such as NO<sub>x</sub>, CO, and VOCs,  
 286 are transported to the downwind area, hence the reduced ozone peak concentration in  
 287 downwind area (Carnero et al., 2010; Shan et al., 2010).

288 In addition, the differences of ozone peaks between DL station and urban sites were  
 289 significantly decreased from 18.20 ppbv to 2.72 ppbv during 2004–2010 and 2011–2015. This  
 290 change may be related to the expansion of urbanization of Beijing. With city expansion and  
 291 economic development, the district near DL station was urbanized and easily influenced by  
 292 anthropogenic emissions. Santini et al.(2010) found Beijing urban extent estimated from  
 293 Landsat data was from 1105km<sup>2</sup> to 4139km<sup>2</sup> between 2000 and 2009. Jacobson et al. (2015)  
 294 pointed that urbanization decreases the concentrations of many surface chemicals due to their  
 295 vertical dilution but increases near-surface ozone.

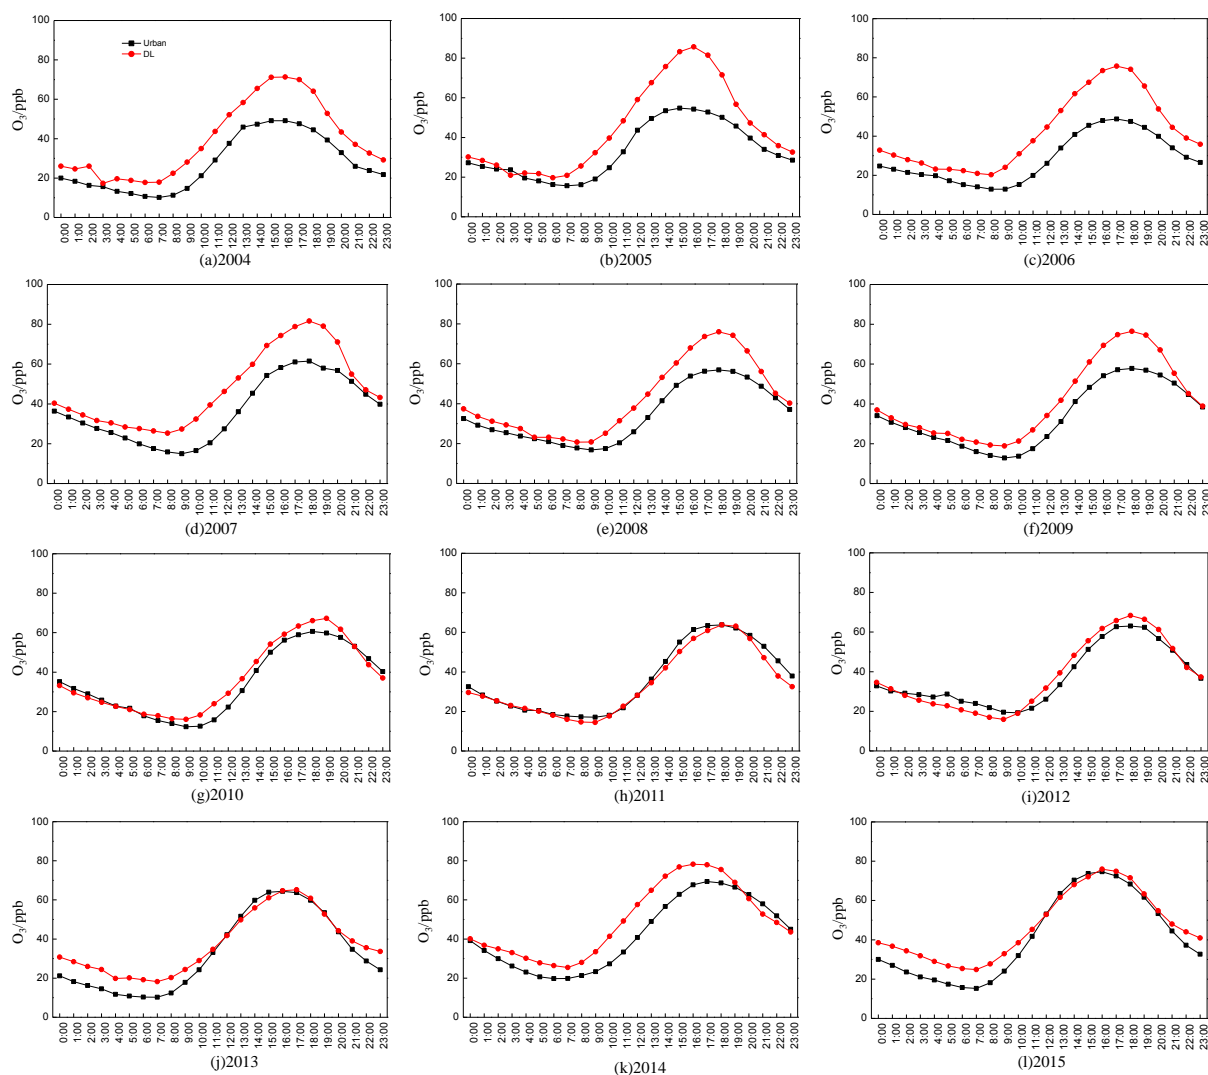

299 **Fig. 5** Diurnal variations of ozone in urban areas and at DL station from May to September during 2004–2015 in Beijing  
 300  
 301

302  
303  
304  
305

**Table 2** Peak ozone concentration from May to September during 2004–2015 at DL station compared with the urban city of Beijing

| Parameter                      | 2004  | 2005  | 2006  | 2007  | 2008  | 2009  | 2010 | 2011 | 2012 | 2013 | 2014 | 2015 | 2004~2015 |
|--------------------------------|-------|-------|-------|-------|-------|-------|------|------|------|------|------|------|-----------|
| delay hour/h                   | 1     | 1     | 0     | 0     | 0     | 0     | 1    | 1    | 0    | 1    | 0    | 1    | 0         |
| concentration difference /ppbv | 22.18 | 30.95 | 27.00 | 20.11 | 19.09 | 18.67 | 6.64 | 0.33 | 5.28 | 0.78 | 8.83 | 0.24 | 12.38     |

306  
307  
308  
309  
310

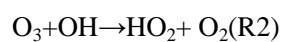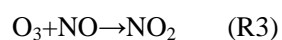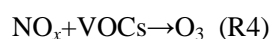

311  
312

### 3.3 Emission reductions on ozone concentrations

313 Prevention and control of air pollution in BTH region and its surrounding areas, such as  
314 Shandong, Shanxi, and Inner Mongolia, effectively reduced the air pollutants' emission  
315 intensity caused by "human activities" during the parade on the 70th Victory Memorial Day  
316 for the Chinese People's War of Resistance against Japanese Aggression. Local enhanced  
317 reduction measures in Beijing were implemented firstly in S2 (August 20~31, 2015) stage, and  
318 regional enhanced reduction measures in Beijing and its surrounding areas were implemented  
319 subsequently in S3 (September 01~03, 2015) stage. Calculated average concentrations of CO,  
320 NO<sub>2</sub>, and O<sub>3</sub> in S2 and S3 stages decreased by 31.48%, 43.97%, and 13.21% at urban sites,  
321 and by 20.93%, 57.10%, and 23.62% at DL site, respectively (**Table 3; Fig. 6**) compared with  
322 those in S1 (August 01~19, 2015) and S4 (September 04~30, 2015) stages. After the  
323 implementation of enhanced reduction measures in the surrounding area in S3 stage, average  
324 concentrations of NO<sub>2</sub> and O<sub>3</sub> at the urban sites decreased by 3.95% and **8.05%**, respectively  
325 compared with those in S2 stage, and average concentrations of CO in S3 were close to those  
326 in S2. Overall, the enhanced reduction measures decreased most air pollutants in Beijing  
327 significantly and effectively.

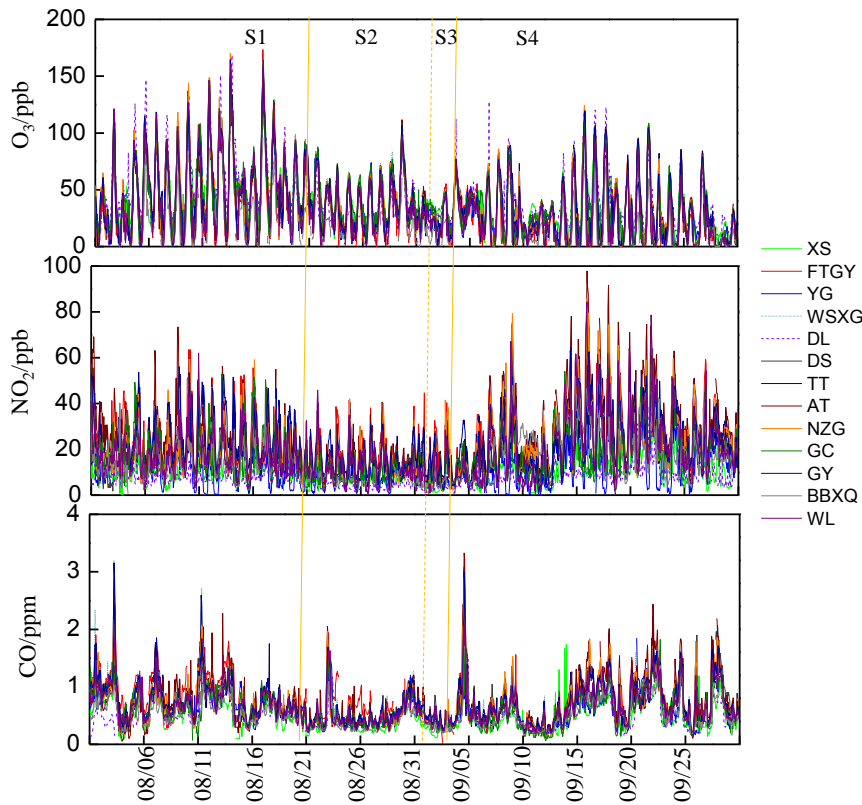

328  
329 **Fig. 6** Concentrations of main air pollutants in urban Beijing from August 01 to September 30 in 2015.

330  
331  
332 **Table 3** Average concentrations of main air pollutants at urban sites at four stages in Beijing in 2015

333

| Pollutants           | Stage | XS    | FTGY  | YG    | WSXG  | DS    | TT    | AT    | NZG   | GC    | GY    | BBXQ  | WL    | DL    |
|----------------------|-------|-------|-------|-------|-------|-------|-------|-------|-------|-------|-------|-------|-------|-------|
| O <sub>3</sub> /ppb  | S1    | 52.96 | 50.47 | 48.86 | 51.41 | 46.89 | 48.37 | 50.17 | 53.21 | 52.23 | 50.88 | 34.26 | 51.33 | 56.37 |
|                      | S2    | 38.02 | 34.67 | 38.89 | 39.73 | 35.14 | 36.14 | 37.78 | 39.22 | 42.64 | 36.92 | 17.66 | 32.97 | 33.55 |
|                      | S3    | 36.59 | 34.61 | 33.72 | 34.38 | 31.36 | 33.23 | 35.54 | 34.43 | 37.46 | 33.97 | 13.40 | 30.47 | 36.93 |
|                      | S2~S3 | 37.31 | 34.64 | 36.31 | 37.05 | 33.25 | 34.68 | 36.66 | 36.83 | 40.05 | 35.44 | 15.53 | 31.72 | 35.24 |
|                      | S4    | 33.66 | 31.82 | 28.95 | 28.09 | 27.49 | 25.23 | 32.30 | 29.77 | 28.69 | 31.97 | 16.78 | 26.69 | 35.90 |
| NO <sub>2</sub> /ppb | S1    | 9.89  | 25.72 | 12.17 | 19.60 | 17.95 | 19.72 | 24.95 | 19.42 | 19.04 | 24.64 | 15.00 | 18.32 | 8.63  |
|                      | S2    | 6.02  | 16.38 | 6.59  | 13.20 | 12.89 | 14.87 | 14.98 | 13.16 | 10.53 | 15.17 | 7.55  | 12.90 | 3.71  |
|                      | S3    | 5.78  | 16.45 | 7.67  | 12.98 | 12.69 | 13.85 | 13.60 | 12.33 | 11.50 | 14.42 | 7.16  | 9.70  | 3.97  |
|                      | S2~S3 | 5.90  | 16.42 | 7.13  | 13.09 | 12.79 | 14.36 | 14.29 | 12.74 | 11.01 | 14.79 | 7.35  | 11.30 | 3.84  |
|                      | S4    | 11.68 | 27.32 | 14.35 | 22.42 | 25.06 | 25.01 | 31.52 | 26.26 | 20.27 | 23.90 | 21.34 | 24.27 | 9.26  |
| CO/ppm               | S1    | 0.58  | 0.98  | 0.73  | 0.85  | 0.78  | 0.80  | 0.79  | 0.78  | 0.74  | 0.82  | 0.57  | 0.75  | 0.54  |
|                      | S2    | 0.35  | 0.73  | 0.47  | 0.50  | 0.45  | 0.46  | 0.49  | 0.45  | 0.45  | 0.49  | 0.34  | 0.42  | 0.38  |
|                      | S3    | 0.36  | 0.63  | 0.52  | 0.58  | 0.55  | 0.56  | 0.57  | 0.51  | 0.49  | 0.56  | 0.38  | 0.50  | 0.44  |
|                      | S2~S3 | 0.36  | 0.68  | 0.50  | 0.54  | 0.50  | 0.51  | 0.53  | 0.48  | 0.47  | 0.52  | 0.36  | 0.46  | 0.41  |
|                      | S4    | 0.50  | 0.74  | 0.61  | 0.78  | 0.76  | 0.74  | 0.82  | 0.74  | 0.58  | 0.74  | 0.57  | 0.68  | 0.50  |

334  
335 In order to eliminate the influence of meteorological factors, we counted the observed  
336 variations of meteorological elements from August 20 to September 05 at GXT station in  
337 Beijing between 2010 and 2015 (We only collected meteorological data for the past five  
338 years). From **Table 4**, the temperature and wind speed at ground which can affect ozone  
339 concentration directly changed slightly during the study periods. Average temperature was

340 fluctuating between 23.6~24.3°C and it was lowest in 2011 and highest in 2013. Average  
 341 wind speeds was fluctuating between 1.4~1.9 m s<sup>-1</sup>, suggesting the atmosphere was generally  
 342 stable in August in Beijing. Average relative humidity and surface pressure was also  
 343 possessing the same characteristics. Frequency of the north wind at 850hPa directly affects  
 344 vertical diffusion of ozone. Average frequency of the north wind at 850hPa was between  
 345 12.1% and 41.2% and it changed to 24.3% from August 20 to September 05, 2015 indicating  
 346 the atmosphere was also relatively stable in the vertical direction. It is reported that both  
 347 sunshine hours and visibility in BTH region have been decreasing in the past decades (Yang  
 348 et al., 2009; Zhao et al., 2011). But we could not detect the significant decrease of sun-shine  
 349 hours due to lack of observed meteorological data. Briefly, we suppose that the  
 350 meteorological elements might **play only minor role in** the ozone concentration changes in  
 351 Beijing, and then focus our discussion on the effects of regional emission reduction measures.

352  
 353 **Table 4.** Average meteorological elements from August 20 to September 05 at GXT station in Beijing between 2010 and 2015.

| Year | RH/% | Surface Pressure/hPa | T/°C | Speed/(m s <sup>-1</sup> ) | Frequency of the north wind at 850hPa /% | T at 850hPa /°C |
|------|------|----------------------|------|----------------------------|------------------------------------------|-----------------|
| 2010 | 70.7 | 1008.0               | 24.1 | 1.6                        | 20.6                                     | 16.0            |
| 2011 | 73.2 | 1007.4               | 23.6 | 1.7                        | 12.1                                     | 16.1            |
| 2012 | 68.6 | 1006.8               | 23.8 | 1.9                        | 41.2                                     | 15.9            |
| 2013 | 66.2 | 1005.8               | 24.3 | 1.9                        | 25                                       | 16.1            |
| 2014 | 67.6 | 1006.5               | 24.2 | 1.7                        | 14.7                                     | 16.7            |
| 2015 | 69.1 | 1009.9               | 24.1 | 1.4                        | 24.3                                     | 13.9            |

354  
 355 We further analyzed the year-on-year comparisons of diurnal variations of ozone from  
 356 2004 to 2015 during the same periods of air quality assurance stages (S2 and S3) (**Fig. 7ab**).  
 357 Comparing the ozone peaks in urban Beijing during S2 and S3 stages between 2004-2014 and  
 358 2015 (the year of taking emission reduction measures to ensure the regional air quality), the  
 359 ozone peak in 2015 was 3 hours earlier and 0.91 ppbv lower compared to the average ozone  
 360 peaks during the period of 2004-2014. Whereas comparing the diurnal variations of ozone at  
 361 DL site during S2 and S3 stages between 2004-2014 and 2015, the ozone peak in 2015 was  
 362 10.98 ppbv lower and 2 hours earlier compared to that during the period of 2004-2014. The  
 363 ozone peaks between urban sites and DL site were much closer (only about 0.48 ppbv) after  
 364 the a reduction of anthropogenic emissions in 2015. The earlier ozone peaks indicated the  
 365 approximate photochemical equilibrium (R5-R7) of O<sub>3</sub>, NO and NO<sub>2</sub> was moved up in Beijing  
 366 during the day due to regional emission reductions. Therefore, a reduction of anthropogenic  
 367 emissions such as VOCs and NO<sub>x</sub> in urban areas made the ozone peaks decrease  
 368 significantly and appear 2~3 hours earlier compared to the scenarios of no emission reductions



369 which was a very interesting phenomenon and first found in Beijing and it could also reduce  
 370 ozone concentration efficiently especially at background sites or downwind areas by the  
 371 weakened regional transport which was coincident with the study of Seinfeld  
 372 (Seinfeld ,2006) . Higher VOCs emission reduction caused the slight decrease in urban area  
 373 but significant decrease at downwind DL background station during the 2015 Grand Military  
 374 Parade periods.

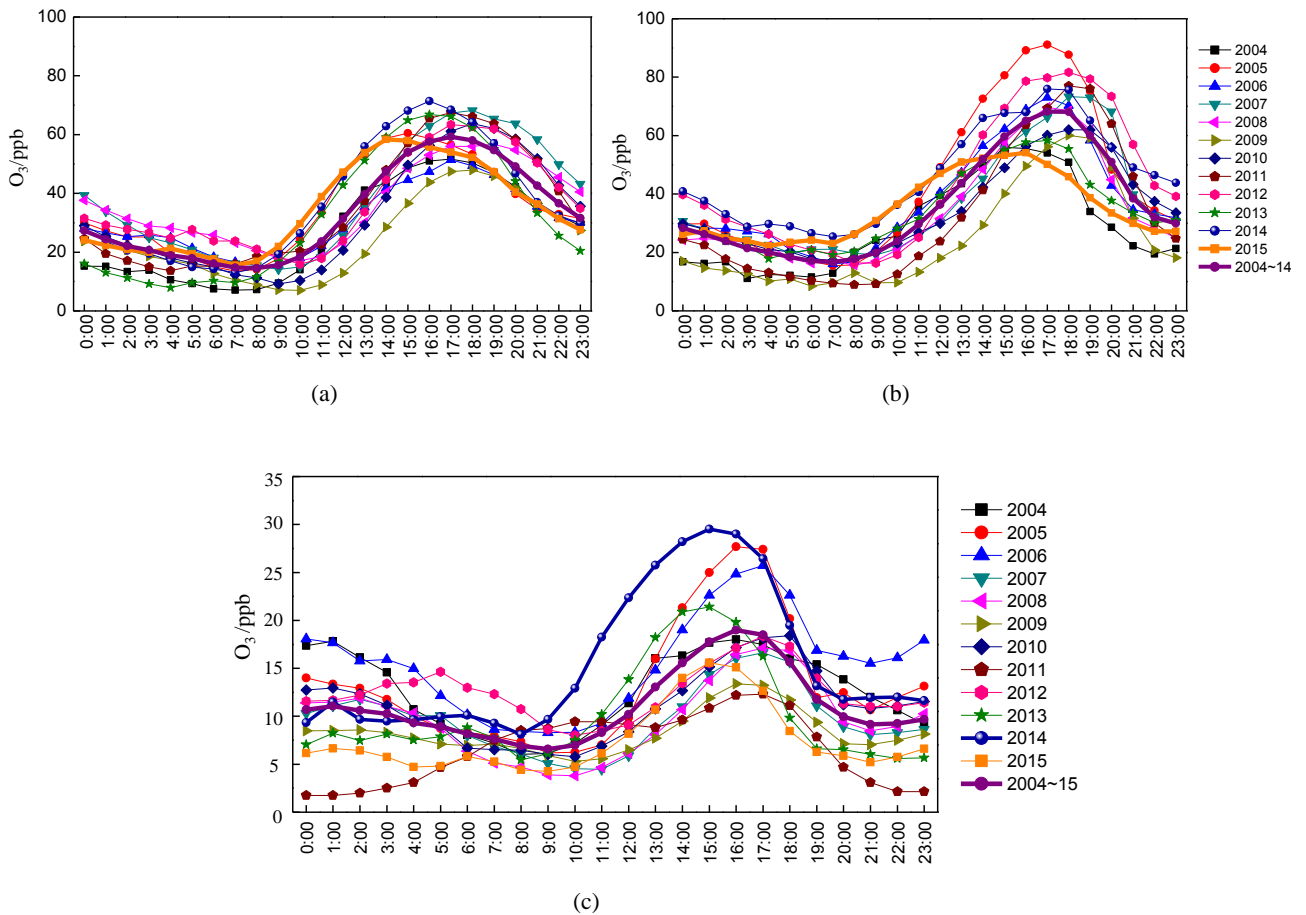

375  
 376  
 377

378  
 379

380 **Fig. 7** Diurnal variations of ozone in urban Beijing (a) and at DL station (b) during S2 and S3 stages from 2004 to 2015  
 381 compared to that of APEC meeting air quality assurance period (Nov 1~Nov 12,2014) in urban Beijing (c) from 2004 to  
 382 2015

383

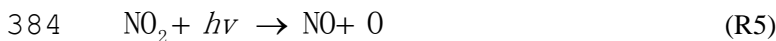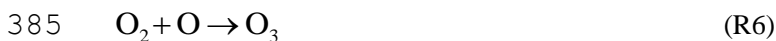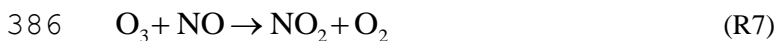

387

388 Compared to the variations of ozone during Asia-Pacific Economic Cooperation (APEC)  
 389 meeting air quality assurance period (Nov 1~Nov 12,2014;**Fig7c**) in urban Beijing,the ozone  
 390 peak in 2014 was 1hour earlier and about 9.6 ppbv higher compared to the average ozone



391 peaks during the period of 2004-2015 although Beijing and its surrounding areas adopted  
392 different levels of emission reduction measures.

393 As we all know,  $\text{NO}_x$  and VOCs emission control can considerably affect the  $\text{O}_3$   
394 concentration, but ozone generation is not a simple linear relationship with its precursors  
395 (Sillman, 1999). Ozone pollution is mainly concentrated in summer, and biogenic emissions  
396 accounted for a majority of the total VOCs. Therefore, the emission reduction of VOCs via  
397 anthropogenic measures cannot make it higher than that of  $\text{NO}_x$ .

398 The previous studies had proved that HCHO and  $\text{NO}_2$  from the OMI serve as appropriate  
399 indicators for *in situ* observations of total reactive nitrogen and VOCs (Liu et al.,2016;Duncan  
400 et al.,2010). OMI tropospheric HCHO/ $\text{NO}_2$  Ratio (Ratio) $<1$  represents  $\text{PO}_3$  reduces with  
401 diminishing in VOCs (VOC-limited conditions), and Ratio $>2$  represents  $\text{NO}_x$ -limited  
402 conditions. When the ratio is between 1 and 2 indicates a transition regime (mixed VOCs-  
403  $\text{NO}_x$ -limited regime) where the instantaneous  $\text{PO}_3$  could be affected by both VOCs and  $\text{NO}_x$   
404 emissions. Three episodes are separately defined in this study: 1st episodes is defined as the  
405 period of Parade (from August 20th to September 3rd 2015); 2nd and 3rd episodes are defined  
406 as the “pre-Parade” from August 1st to 19th and the “post-Parade” from September 4th to  
407 30th. Similarly, the three episodes of APEC are respectively defined as pre-APEC period  
408 (from October 15th to 30th), APEC period (from November 1st to 12th) and post-APEC  
409 period (from November 13th to 30th).

410 With a series of strict emission control measures during Parade, the ratio retrieved from  
411 OMI had changed from 1.70 to 3.72. It means the  $\text{PO}_3$  conditions had also changed from  
412 mixed VOCs- $\text{NO}_x$ -limited to a predominantly  $\text{NO}_x$ -limited condition due to the sharp drop of  
413  $\text{NO}_2$  during Parade periods. After the strict emission control measures, the  $\text{NO}_2$  returned to  
414 relatively high values as pre-Parade and the ratio was also diminished (Ratio = 0.90,  $< 1$ ),  
415 which indicated the  $\text{PO}_3$  was turned into a VOCs-limited condition during post-Parade. To  
416 ensure the air quality during the military parade in 2015,  $\text{NO}_x$  and VOCs emission control in  
417 Beijing and its surrounding areas lasted for almost a month, and VOCs emission control  
418 measures was much stricter than  $\text{NO}_x$ ; thereby, ensuring the reduction of VOCs emission  
419 (45%) is higher than that of  $\text{NO}_x$  (30%)(MEP, 2015). Higher ratios by emission control  
420 measures during Parade were not only work effectively for  $\text{NO}_2$  pollution control patterns but  
421 also effective for  $\text{O}_3$  controlling.

422 Compared with pre-APEC, the ratio was changed from around 1.21 (VOCs-limited and  
423 mixed VOCs- $\text{NO}_x$ -limited) to around 1.60 (mixed VOCs- $\text{NO}_x$ -limited and  $\text{NO}_x$ -limited) in  
424 Beijing during APEC.  $\text{NO}_2$  and HCHO had a certain reduction during APEC which should

425 lead the O<sub>3</sub> diminishing. Conversely, the ozone concentration was increasing compared to  
426 pre-APEC. Regional VOCs emission (about 30%) was equal to that of NO<sub>x</sub> (about 30%)  
427 (MEP, 2015) during APEC periods and it was easily affected by the relatively unfavorable  
428 diffusion conditions in Autumn in Beijing which lead to the concentrations of NO<sub>x</sub> and CO  
429 two times larger than those of the 2015 Grand Military Parade. So different emission  
430 reduction ratios between NO<sub>x</sub> and VOCs and different weather conditions led to different  
431 VOCs (ppbv)/NO<sub>x</sub> (ppbv) ratios during the 2015 Grand Military Parade periods and APEC  
432 meeting. These results indicated that emission controls in this case maybe not strict enough or  
433 worked well to lessen the levels of ozone. This phenomenon of concentrations of most of the  
434 air pollutants decreased, whereas concentrations of ozone increased during APEC meeting  
435 period which was consistent with the study of Wang (Wang et al,2015b; Liu et al.,2016).

436  
437

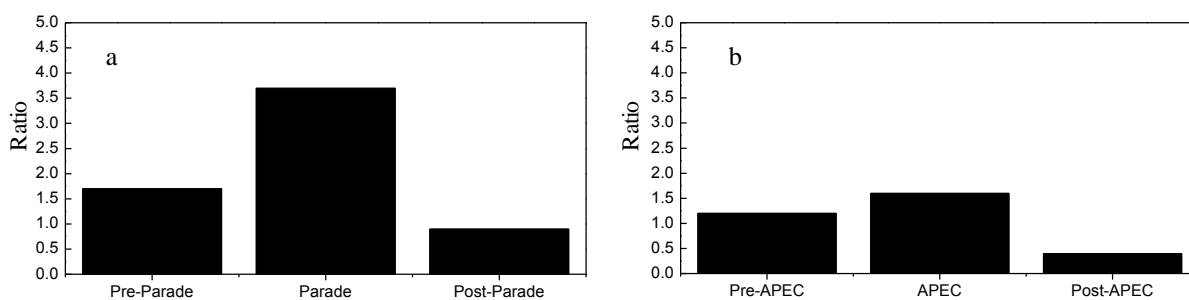

438  
439 **Fig. 8** The variations of averaged Ratio of three periods during Parade (A) and during APEC (B) at Beijing urban sites

440

441 Above all, success of air quality protection during the 2015 Grand Military Parade proved  
442 that the current governance policy is correct and far-sighted. Moreover, ozone pollution is  
443 typically a regional rather than a local issue. Thus, in the future, clean air action plan in  
444 Beijing should be implemented on the basis of the lessons from regional air pollution  
445 prevention and control mechanism to promote the continuous improvement of regional air  
446 quality unswervingly and jointly. Combined with multiple observation stations of ozone in a  
447 long period, the numerical models should also be combined to further analyze the ozone  
448 formation, so as to develop effective ozone pollution control measures.

449

#### 450 **4 Conclusions**

451 Although Beijing local government has spent considerable efforts in Beijing to improve  
452 air quality and concentrations of the main air pollutants declined significantly. Results  
453 showed that annual averaged concentration of daily maximum 1 h ozone (O<sub>3</sub>1h) was all

454 increasing at urban sites (1.79 ppbv yr<sup>-1</sup>) and DL background station (2.05 ppbv yr<sup>-1</sup>) while  
455 daily maximum 8 h averaged ozone concentration (O<sub>3</sub>8h) was increasing in urban area (1.14  
456 ppbv yr<sup>-1</sup>) and slightly decreasing at DL background station (-0.47 ppbv yr<sup>-1</sup>) from 2004 to  
457 2015 due to different ozone sensitivity regimes and ratios of NO<sub>2</sub>/NO.

458 Diurnal variations of ozone peaks obtained at the downwind DL station were about 1  
459 hour later than those of the urban sites from May to October in different years and  
460 concentrations of ozone at downwind background station were much higher than those at  
461 urban sites. Moreover, differences of ozone peaks between urban sites and DL background  
462 station were becoming significantly smaller in recent years, which may be related to regional  
463 ozone transport and the expansion urbanization of Beijing.

464 During several major activities held in Beijing such as the Asia-Pacific Economic  
465 Cooperation (APEC) Summit in 2014 and the Parade on the 70th Victory Memorial Day for  
466 the Chinese People's War of Resistance against Japanese Aggression in 2015, Beijing and its  
467 neighboring cities implemented numerous control strategies, including the suspension of  
468 factory operations and odd-and-even license plate rules. A reduction of anthropogenic  
469 emissions such as VOCs and NO<sub>x</sub> could reduce ozone efficiently especially in downwind  
470 areas of Beijing and made the ozone peaks decrease significantly and appear 2~3hours earlier  
471 compared to the scenarios of no emission reductions.

472 On the basis of the discussion and analyses, several recommendations have been made  
473 for understanding the heavy air pollution in Beijing:

474 (1) Compared to the increasing ozone during APEC period, average ozone concentration  
475 decreased significantly in the downwind areas of Beijing due to larger ratios of VOCs/NO<sub>x</sub>.  
476 In order to decrease the ozone concentration in Beijing, emissions of VOCs should be reduced  
477 larger than those of NO<sub>x</sub> in Beijing. The collaborative control of various pollutants is  
478 becoming very important in Beijing.

479 (2) As air pollution is a regional problem, therefore, the simultaneous implementation of a  
480 regional prevention and control mechanism is necessary to promote continuous air quality  
481 improvement in Beijing.

482 (3) Many of the world's thriving cities are struggling with serious air pollution, Beijing's  
483 experience in controlling ozone against a backdrop of rapid expansion during air quality  
484 assurance periods is a story that should be shared with other emerging economies and  
485 burgeoning cities.

486  
487

488 **Acknowledgments**

489 This study was supported by the Commonwealth Project of the Ministry of  
490 Environmental Protection (NO.201409005) and the National Key Technology R&D Program  
491 (2014BAC23B03). For detailed data, please see website <http://zx.bjmemc.com.cn/> or send an  
492 email to 15001195306@163.com.

493 The English in this document has been checked by at least two professional editors, both  
494 native speakers of English.

495 **References**

496 An, J.L.: Ozone production efficiency in Beijing area with high NO<sub>x</sub> emissions, *Acta Sci.*  
497 *Circumst.*, 26, 652-657, 2006.

498 BJEPB (Beijing Environmental Protection Bureau), 2014. Report on the environmental  
499 quality in Beijing. Beijing: BJEPB. (in Chinese)

500 Beijing Statistics Bureau, 2014. Beijing Statistical Yearbook 2013. China Statistics  
501 Press, Beijing. (in Chinese)

502 Carnero, J.A.A., Bolivar, J.P., and Morena, B.A.: Surface ozone measurements in the  
503 southwest of the Iberian Peninsula (Huelva, Spain), *Environ. Sci. and Pollut. Res.* 17,  
504 355~368, 2010.

505 Chan, C.Y., Chan, L.Y., Cui, H., Zheng, X.D., Zheng, Y.G., Qin, Y., and Li, Y.S.: Origin  
506 of the springtime tropospheric ozone maximum over east China at Linan in 2001, *Tellus B* ,55  
507 (5), 982-992, 2003.

508 Chou, C.C.K., Tsai, C.Y., Shiu, C.J., Liu, S.C., and Zhu, T.: Measurement of NO<sub>y</sub> during  
509 Campaign of Air Quality Research in Beijing 2006 (CAREBeijing-2006): implications for the  
510 ozone production efficiency of NO<sub>x</sub>, *J. Geophys. Res.*, 114,  
511 D00G01, 2009, <http://dx.doi.org/10.1029/2008JD010446>.

512 Ding, A.J., Fu, C.B., Yang, X.Q., Sun, J.N., Zheng, L.F., Xie, Y.N., Herrmann, E.,  
513 Nie, W., Petaja, T., Kerminen, Y.M., and Kulmala, M.: Ozone and fine particle in the western  
514 Yangtze River Delta: an overview of 1 year data at the SORPES station, *Atmos. Chem.*  
515 *Phys.* ,13(11), 5813-5830, 2013.

516 Duncan, B. N., Yoshida, Y., Olson, J.R., and Crawford, J.H.: Application of OMI  
517 observations to a space-based indicator of NO<sub>x</sub> and VOC controls on surface ozone  
518 formation, *Atmos. Environ.*, 44, 2213–2223, 2010.

519 Fiore, A. M., Dentener, F. J., Wild, O., Cuvelier, C., Schultz, M. G., Hess, P., Textor, C.,  
520 Schulz, M., Doherty, R. M., and Horowitz, L. W.: Multimodel estimates of intercontinental  
521 source-receptor relationships for ozone pollution, *J. Geophys. Res.*, 114, D04301,  
522 doi:10.1029/2008JD010816, 2009.

523 Ge, B.Z., Xu, X.B., Lin, W.L., Lie, J., and Wang, Z.F.: Impact of the regional transport of  
524 urban Beijing pollutants on downwind areas in summer: ozone production efficiency  
525 analysis, *Tellus B* 64, 17348, DOI: 10.3402/tellusb.v64i0.17348, 2012.

526 Jacobson, M.Z., Nghiem, S.V., Sorichetta, A. and Whitney, N. : Ring of impact from the  
527 mega-urbanization of Beijing between 2000 and 2009, *J. Geophys. Res., Atmos.*, 120, 5740–  
528 5756, doi:10.1002/2014JD023008, 2015.

529 Jonson, J. E., Simpson, D., Fagerli, H., and Solberg, S.: Can we explain the trends in  
530 European ozone levels?, *Atmos. Chem. Phys.*, 6, 51–66, <http://www.atmos-chem-phys.net/6/51/2006/>, 2006.

532 Kalabokas, P.D., Viras, L.G., Bartzis, J.G., and Repapis, C.C.: Mediterranean rural ozone  
533 characteristics around the urban area of Athens, *Atmos. Environ.*, 34, 5199~5208, 2000.

534 Kendall, M.G., 1975. Rank Correlation Methods, 4th ed. Charles Griffin, London.

535 Li, L., Chen, C.H., Huang, C., Huang, H.Y., Zhang, G.F., Wang, J.Y., Wang, H.L., Lou,

536 S.R., Qiao, L.P., Zhou, M., Chen, M.H., Chen, Y.R., Streets, S.G., Fu, J.S., and Jang, C.J.:

537 Process analysis of regional ozone formation over the Yangtze River Delta, China using the

538 Community Multi-scale Air Quality modeling system, *Atmos. Chem. Phys.*, 12 (22), 10971-

539 10987, 2012.

540 Li, W.J., Zhou, S.Z., Wang, X.F., Xu, Z., Yuan, C., Yu, Y.C., Zhang, Q.Z., and Wang,

541 W.X.: Integrated evaluation of aerosols from regional brown hazes over northern China in

542 winter: concentrations, sources, transformation, and mixing states, *J. Geophys. Res.*, 116 (D9),

543 doi: 10.1029/2010JD015099, 2011.

544 Lin, W., Xu, X., Zhang, X., Tang, J.: Contributions of pollutants from North China Plain

545 to surface ozone at the Shangdianzi GAW Station, *Atmos. Chem. Phys.*, 8, 5889-

546 5898, 2008, <http://dx.doi.org/10.5194/acp-8-5889-2008>.

547 Liu, H.R., Liu, C., Xie, Z.Q., Li, Y., Huang, X., Wang, S.S., Xu, J., and Xie, P.H.: A paradox for

548 air pollution controlling in China revealed by "APEC Blue" and "Parade Blue", *Scientific*

549 *Reports*, 6:34408. DOI: 10.1038/srep34408.

550 Lu, K., Zhang, Y., Su, H., Brauers, T., Chou, C.C., Hofzumahaus, A., Liu, S.C., Kita, K.,

551 Kondo, Y., Shao, M., Wahner, A., Wang, J.L., Wang, X.S., and Zhu, T.: Oxidant (O<sub>3</sub> + NO<sub>2</sub>)

552 production processes and formation regimes in Beijing, *J. Geophys. Res. Atmos.* 115

553 (D10306), doi:10.1029/2010JD014394, 2010.

554 Meng, Z.Y., Xu, X.B., Yan, P., Ding, G.A., Tang, J., Lin, W.L., Xu, X.D., and Wang,

555 S.F.: Characteristics of trace gaseous pollutants at a regional background station in Northern

556 China, *Atmos. Chem. Phys.*, 9, 927-936, 2009.

557 MEP. 2013. GB 3095-2012 Ambient air quality standard [S]. Beijing: MEP. (in Chinese)

558 **Ministry of environmental protection. Air quality protection program for the 2015 Grand**

559 **Military Parade. Beijing: Beijing Environmental Science Press, 2015.**

560 Pablo, P.D., Francisco J.J.H., and Eduardo G.D.R.: Multifractal analysis of ground-level

561 ozone concentrations at urban, suburban and rural background monitoring sites in

562 Southwestern Iberian Peninsula, *Atmos. Pollut. Res.*, 4, 229~237, 2013.

563 Parrish, D. D., Law, S.K., Staehelin, J.N.M., Derwent, R., Cooper, O.R., and Tanimoto,

564 H.: Long-term changes in lower tropospheric baseline ozone concentrations: Comparing

565 chemistry-climate models and observations at northern midlatitudes, *J. Geophys. Res.*, 119,

566 5719~5736, 2014.

567 Pollack, I. B., Ryerson, T. B., Trainer, M., Neuman, J. A., Roberts, J. M., and Parrish, D.

568 D.: Trends in ozone, its precursors, and related secondary oxidation products in Los Angeles,

569 California: A synthesis of measurements from 1960 to 2010, *J. Geophys. Res.*, 118, 5893–5911,

570 doi:10.1002/jgrd.50472, 2013.

571 Ran, L., Zhao, C., Geng, F., Tie, X.X., Tang, X., Peng Li Zhou, G.Q., Yu, Q., Xu, J.M.,

572 and Guenther, A.: Ozone photochemical production in urban Shanghai, China: analysis based

573 on ground level observations, *J. Geophys. Res. Atmos.*, 114 (D15).

574 Richter, A., Burrows, J. P., Nusz, H., Granier, C., and Niemeier, U.: Increase in

575 tropospheric 30 nitrogen dioxide over China observed from space, *Nature*, 437, 129–132,

576 2005.

577 Saitanis, C.J.: Background ozone monitoring and phytodetection in the greater rural area of

578 Corinth Greece, *Chemosphere*, 51, 913~923, 2003.

579 Santini, M., Taramelli, A. and Sorichetta A.: ASPHAA: A GIS-based algorithm to

580 calculate cell area on a latitude-longitude (geographic) regular grid, *Trans. GIS*, 14(3), 351–

581 377, doi:10.1111/j.1467-9671.2010.01200.x, 2010.

582 Seinfeld, J.H. and Pandis, S.N.: *Atmospheric Chemistry and Physics: From Air Pollution*

583 *to Climate Change*. ed John Wiley & Sons, New York, 2006.

584 Seinfeld, J.H.: Air pollution: a half century of progress. *AICHE Journal*,50, 1096~1108,  
585 doi: 10.1002/aic.10102,2004.

586 Shao, M., Lu, S., Liu, Y., Xie, X., Chang, C., Huang, S., and Chen, Z.:Volatile organic  
587 compounds measured in summer in Beijing and their role in ground-level ozone formation, *J.*  
588 *Geophys. Res.*, 114, D00G06,doi: 10.1029/2008JD010863,2009.

589 Shao, M., Tang, X., Zhang, Y.,and Li, W.:City clusters in China: air and surface water  
590 pollution ,*Front. Ecol. Environ.* ,4 (7), 353-361, 2006.

591 Shan, W.P., Zhang, J.D., Huang, Z.X., and You, L.N.: Characterizations of ozone  
592 and related compounds under the influence of maritime and continental winds at a  
593 coastal site in the Yangtze Delta, nearby Shanghai,*Atmos. Res.*, 97, 26~34,2010.

594 Sillman, S.:The relation between ozone, NO<sub>x</sub> and hydrocarbons in urban and polluted  
595 rural environments,*Atmos. Environ.*,33,1821–1845,doi:10.1016/S1352-2310(98)00345-  
596 8,1999.

597 Tang, G., Li, X.,Wang, Y., Xin, J., and Ren, X.:Surface ozone trend details and  
598 interpretations in Beijing, 2001-2006,*Atmos. Chem. Phys.* ,9 (22), 8813-8823,2009.

599 Tang, X.,Wang, Z., Zhu, J., Gbaguidi, A.E.,Wu, Q.Z., Li, J., and Zhu, T.:Sensitivity of  
600 ozone to precursor emissions in urban Beijing with a Monte Carlo scheme,*Atmos.*  
601 *Environ.*,44, 3833–3842,2010.

602 Trainer, M., Parrish, D.D., Goldan, P.D., Roberts, J., and Fehsenfeld, F.C.: Review of  
603 observation based analysis of the regional factors influencing ozone concentrations,*Atmos.*  
604 *Environ.*, 34, 2045-2061,2000.

605 Van der, A, R. J., Peters, D. H. M. U., Eskes, H., Boersma, K. F., Roozendael, M. V.,  
606 Smedt, I. D.,and Kelder, H. M.: Detection of the trend and seasonal variation in tropospheric  
607 NO<sub>2</sub> over China, *J. Geophys. Res.*, 111, 1–10,2005.

608 Vingarzan, R.:A review of surface ozone background levels and  
609 trends,*Atmos. Environ.* ,38, 3431-3442,2004.

610 Wang, J. L.,Wang,C.H.,Lai,C.H.,Chang,C.C.,Liu,Y.,Zhang,Y.H.,Liu,S.,and  
611 Shao,M.:Characterization of ozone precursors in the Pearl River Delta by time series  
612 observation of non-methane hydrocarbons,*Atmos. Environ.*,42,6233-6246,  
613 doi:10.1016/j.atmosenv.2008.01.050,2008.

614 Wang,M.,Shao,M.,Chen,W.,Lu,S.,Liu,Y.,Yuan,B.,Zhang,Q.,Chang,C.C.,Wang,B. and  
615 Zeng, L.: Trends of non-methane hydrocarbons (NMHC) emissions in Beijing during 2002–  
616 2013,*Atmos. Chem. Phys.*, 15, 1489-1502, doi:10.5194/acp-15-1489-2015,2015a.

617 Wang, Y., Konopka, P., Liu, Y., Chen, H., Muller, R., Ploger, F., Riese, M., Cai, Z., and  
618 Lu, D.:Tropospheric ozone trend over Beijing from 2002-2010: ozonesonde measurements  
619 and modeling analysis,*Atmos. Chem. Phys.* ,12 (18), 8389-8399,2012.

620 Wang, Y., McElroy, M.B., Munger, J.W., Hao, J.M., Ma, H., Nielsen, C.P., and Chen,  
621 Y.:Variations of O<sub>3</sub> and CO in summertime at a rural site near Beijing, *Atmos.Chem. Phys.*, 8  
622 (21), 6355-6363,2008.

623 Wang,Y.H., Hu,B., Tang,G.Q.,Ji,D.S.,Zhang,H.X.,and Bai,J.H.:Characteristics of ozone  
624 and its precursors in Northern China: A comparative study of three sites,*Atmos. Res.*, 132,  
625 450–459,2013.

626 Wang, Z., Y. Li, T. Chen, L. Li, B. Liu,D. Zhang, F. Sun, Q. Wei, L. Jiang, and Pan, L.  
627 B. : Changes in atmospheric composition during the 2014 APEC conference in Beijing, *J.*  
628 *Geophys. Res.Atmos.*, 120(12),695–707, 2015b.

629 Wei, X., Liu, Q., Lam, K.S.,Wang, T.J.: Impact of precursor levels and global warming on  
630 peak ozone concentration in the Pearl River Delta Region of China ,*Adv. Atmos. Sci.* ,29,  
631 635-645,2012.

632 Willem,W. V., Jessica, L. N., Jason, E.W., Kevin, W. B., John,R.W., and Boersma, K.  
633 F.:Rapid increases in tropospheric ozone production and export from

634 China, *Nature*, 8, 690~695, doi: 10.1038/NGEO2493, 2015.

635 Xu, X., Lin, W., Wang, T., Yan, P., Tang, J., Meng, Z., and Wang, Y.: Long-term trend of  
636 surface ozone at a regional background station in eastern China 1991–2006: enhanced  
637 variability, *Atmos. Chem. Phys.*, 8, 2595–2607, 2008.

638 Yang, Y.H., Zhao, N., Hao, X.H., and Li, C.Q.: Decreasing trend of sunshine hours and related  
639 driving forces in North China, *Theor. Appl. Climatol.*, 97, 91–98, 2009.

640 Yuan, Z.B., Lau, A.K.H., Shao, M., and Louie, P.K.K.: Source analysis of volatile organic  
641 compounds by positive matrix factorization in urban and rural environments in Beijing, *J.*  
642 *Geophys. Res.* 114, 2009.

643 Zhang, J., Wang, T., Chameides, W.L., Cardelino, C., Kwok, J., Blake, D.R., Ding, A.,  
644 and So, K.L.: Ozone production and hydrocarbon reactivity in Hong Kong, Southern  
645 China, *Atmos. Chem. Phys.*, 7 (2), 557–573, 2007.

646 Zhang, Q., Yuan, B., and Shao, M.: Variations of ground-level O<sub>3</sub> and its precursors in  
647 Beijing in summer time between 2005 and 2011, *Atmos. Chem. Phys.*, 14, 6089–6101, 2014.

648 Zhang, R., Sarwar, G., Fung, J.C.H., and Lau, A.K.: Role of photoexcited nitrogen dioxide  
649 chemistry on ozone formation and emission control strategy over the Pearl River Delta, China,  
650 *Atmos. Res.*, 132, 332–344, 2013.

651 Zhang, Y. H., Su, H., Zhong, J.  
652 L., Cheng, F.Y., Zeng, M.L., Wang, S.X., Xiang, Y.R., Wang, J.L., Gao, D.F., Shao, M., Fan, S.J., and  
653 Liu, S.C.: Regional ozone pollution and observation based approach for analyzing ozone-  
654 precursor relationship during the PRIDE-PRD2004 campaign, *Atmos. Environ.*, 42, 6203-  
655 6218, doi:10.1016/j.atmosenv.2008.05.002, 2008.

656 Zhao, P., Zhang, X., Xu, X., and Zhao, X.: Long-term visibility trends and characteristics  
657 in the region of Beijing, Tianjin, and Hebei, China, *Atmos. Res.*, 101, 711–718, 2011.
